# Supplementary material
Source: publisher figshare collection journal article supplement (https://frontiersin.figshare.com/ndownloader/files/21103419)
Supplement: Supplementary file [file 21103419]

# **Cav1.3 L-type calcium channels increase vulnerability of substantia nigra dopaminergic neurons in MPTP mouse model of Parkinson's disease**

**Aditi Verma<sup>1</sup> and Vijayalakshmi Ravindranath<sup>1,2\*</sup>**

<sup>1</sup> Centre for Neuroscience, Indian Institute of Science, Bangalore-560012, India

<sup>2</sup> Centre for Brain Research, Indian Institute of Science, Bangalore-560012, India

**\*Correspondence:**

Vijayalakshmi Ravindranath,  
Centre for Brain Research,  
Indian Institute of Science,  
C.V. Raman Avenue,  
Bangalore - 560012, India,  
Phone: +91-80-22933640,  
Fax: +91-80-23603323,

email: [viji@iisc.ac.in](mailto:viji@iisc.ac.in)

**Keywords:** neurodegeneration; SNpc; MPTP; Cav1.3<sub>42A</sub>; gene expression; alternative splicing

## Supplementary Material

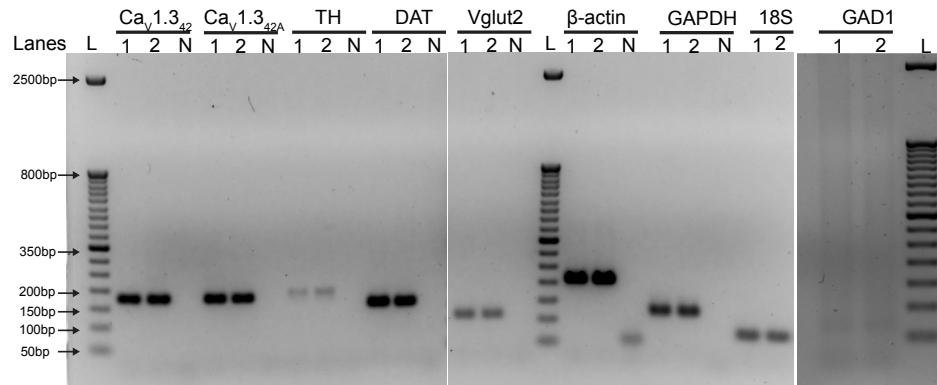

**Figure S1: Primer specificity for all the mouse qRT-PCR primers using agarose gel electrophoresis.**

Single bands were observed at the desired lengths for the mouse qRT-PCR primers, viz.  $Ca_v1.3_{42}$ ,  $Ca_v1.3_{42A}$ , TH, DAT, Vglut2,  $\beta$ -actin, GAPDH, 18S and GAD1 using mouse cDNA derived from control tissue. Two SNpc cDNA samples (1 and 2) and a no template negative control (N) was run for each set of qRT-PCR primers. The qRT-PCR products were run on a 2% agarose gel at 100mV. Ladder used was Invitrogen TrackIt™ 50bp DNA ladder (ThermoFisher Scientific).

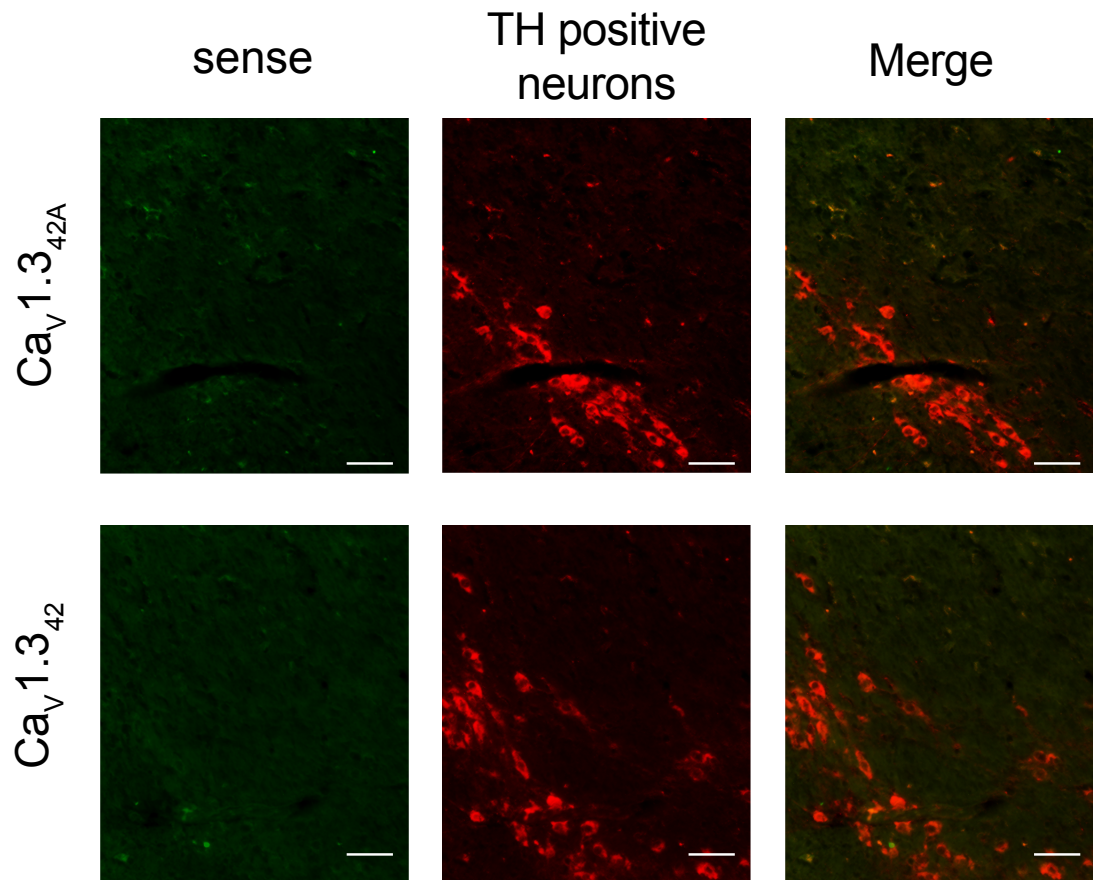

**Figure S2: Absence of signal in sections treated with sense *in situ* hybridization probes.**

The use of sense probes against  $Ca_v1.3_{42A}$  and  $Ca_v1.3_{42}$  did not give fluorescent signal within TH positive neurons in the SNpc using fluorescence *in situ* hybridization and TH immunohistochemistry, respectively. Images were acquired using Zeiss Axio imager M2 fluorescence microscope with a 20X/0.8 objective. Scale bar = 50 $\mu$ m.

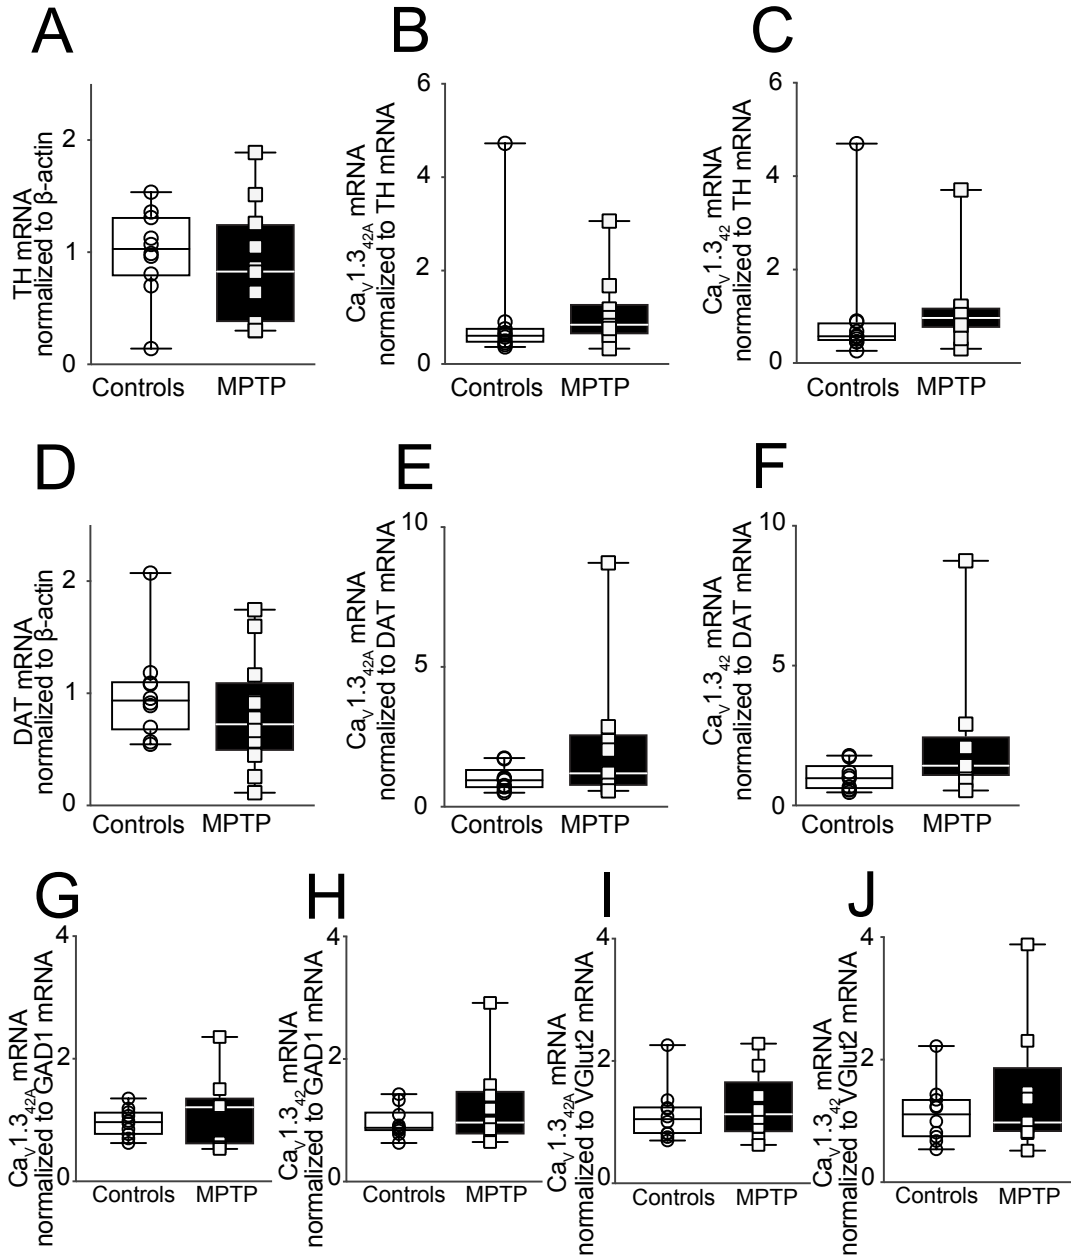

**Figure S3: Cav1.342A and Cav1.342 mRNA levels in the VTA of MPTP-treated mice.**

**(A)** TH mRNA expression in the VTA of mice treated subcutaneously with MPTP (30mg/kg body weight) for 14 days. MPTP treatment did not lead to significant reduction of TH mRNA levels in the VTA ( $p=0.6025$ ,  $t=0.5296$ ,  $df=19$ ). qRT-PCR data were normalized to mRNA levels of  $\beta$ -actin. **(B)** Relative mRNA levels for Cav1.342A (Mann–Whitney  $U = 30$ ,  $n_1 = 10$ ,  $n_2 = 10$ ,  $p=0.1431$ , two-tailed) and **(C)** Cav1.342 (Mann–Whitney  $U = 28$ ,  $n_1 = 10$ ,  $n_2 = 10$ ,  $p=0.1051$ , two-tailed) were found to be unchanged in the SNpc in response to MPTP treatment when the mRNA signal was normalized to TH. **(D)** mRNA levels of DAT were unchanged upon MPTP treatment when normalized to  $\beta$ -actin mRNA levels (Mann–Whitney  $U = 45$ ,  $n_1 = 10$ ,  $n_2 = 12$ ,  $p=0.3463$ , two-tailed). **(E)** Relative mRNA levels for Cav1.342A (Mann–Whitney  $U = 24$ ,  $n_1 = 9$ ,  $n_2 = 9$ ,  $p=0.1615$ , two-tailed) and **(F)** Cav1.342 (Mann–Whitney  $U = 22$ ,  $n_1 = 9$ ,  $n_2 = 9$ ,  $p=0.1135$ , two-tailed) remained unaltered in the VTA in response to MPTP treatment when the mRNA signal was normalized to DAT mRNA levels. **(G)** mRNA levels for



Ca<sub>v</sub>1.3<sub>42A</sub> (Mann–Whitney U = 33, n<sub>1</sub> = 10, n<sub>2</sub> = 9, p=0.3562, two-tailed) and **(H)** Ca<sub>v</sub>1.3<sub>42</sub> (Mann–Whitney U = 35, n<sub>1</sub> = 10, n<sub>2</sub> = 9, p=0.4470, two-tailed) were found to be unchanged in the VTA of MPTP-treated mice upon normalization to GAD1. **(I)** mRNA levels for Ca<sub>v</sub>1.3<sub>42A</sub> (Mann–Whitney U = 40, n<sub>1</sub> = 10, n<sub>2</sub> = 9, p=0.7197, two-tailed) and **(J)** Ca<sub>v</sub>1.3<sub>42</sub> (Mann–Whitney U = 38, n<sub>1</sub> = 10, n<sub>2</sub> = 9, p=0.6038, two-tailed) were unchanged in the VTA of MPTP-treated mice upon normalization to Vglut2. Each point in the scatter represents an individual animal. For controls, n=10, for MPTP treated animals, n=9-10. Unpaired, two-tailed Student's t-test or two-tailed Mann Whitney U was performed for each of the pair-wise comparison. Data represented as box-whiskers plots where each box represents quartiles with the line indicating median. Whiskers show the absolute range.

**Table S1: Sequences for mouse qRT-PCR primers**

| Gene                                               | Primer         | Sequence                   |
|----------------------------------------------------|----------------|----------------------------|
| Ca <sub>v</sub> 1.3 <sub>42</sub><br>(NM_028981.2) | Forward primer | GTCCCTCCAGCTGGTGATGATGA    |
|                                                    | Reverse primer | GGCCCAATGTCATGCAGGGT       |
| Ca <sub>v</sub> 1.3 <sub>42A</sub>                 | Forward primer | GTCCCTCCAGCTGGTGATGATGA    |
|                                                    | Reverse primer | CAGGCAGAGAACTCTAAAGCATCCG  |
| β -actin<br>(NM_007393.5)                          | Forward primer | CCTTCTTGGGTATGGAATCCTGTGGC |

|                           |                |                           |
|---------------------------|----------------|---------------------------|
|                           | Reverse primer | GCGCTCAGGAGGAGCAATGATCTTG |
| 18S rRNA                  | Forward primer | GAGGGAGCCTGAGAAACGG       |
|                           | Reverse primer | GTCGGGAGTGGGTAATTTGC      |
| GAPDH<br>(NM_001289726.1) | Forward primer | GGCCTTCCGTGTTCTTAC        |
|                           | Reverse primer | TGTCATCATACTTGGCAGGTT     |
| TH (NM_009377.1)          | Forward primer | GGAACGGTACTGTGGCTACC      |
|                           | Reverse primer | GAGTGCATAGGTGAGGAGGC      |
| DAT (NM_010020.3)         | Forward primer | GGTTCTACGGTGTCCAGCAA      |

|                     |                |                      |
|---------------------|----------------|----------------------|
|                     | Reverse primer | TAGTGTGGGGGTCTGAAGGT |
| Vglut2(NM_080853.3) | Forward primer | GCGGAGGCAAAGTTATCAAG |
|                     | Reverse primer | CCTGGAATCTGGGTGATGAT |
| GAD1(NM_008077.5)   | Forward primer | GGGTGGTGGACTGCTCATGT |
|                     | Reverse primer | AATTGGCCCTTTCTATGCCG |

**Table S2: qRT-PCR conditions**

| PCR step             | Temperature | Time  | Cycles |
|----------------------|-------------|-------|--------|
| Initial Denaturation | 95°C        | 10min | 1      |
| Denaturation         | 95°C        | 20s   | 40     |
| Annealing            | 60°C        | 30s   | 40     |

|            |      |     |    |
|------------|------|-----|----|
| Elongation | 72°C | 40s | 40 |
|------------|------|-----|----|
